# Supplementary material for: Transdermal delivery of small interfering RNAs with topically applied mesoporous silica nanoparticles for facile skin cancer treatment
Source: Royal Society of Chemistry journal article supplement (doi:10.1039/c9nr06303j), 2019-01-01
Supplement: c9nr06303j1.pdf [file c9nr06303j1.pdf]

## Supplementary Information

### **Transdermal delivery of small interfering RNAs with topically applied mesoporous silica nanoparticles for facile skin cancer treatment**

Daniel Chin Shiuan Lio<sup>a,b,c,†</sup>, Chenghao Liu<sup>c,†</sup>, Myo Myo Swe Oo<sup>a</sup>, Christian Wiraja<sup>a</sup>, Melissa Hui Yen Teo<sup>d</sup>, Mengjia Zheng<sup>a</sup>, Sharon Wan Ting Chew<sup>a,b</sup>, Xiaomeng Wang<sup>c,d,e,f</sup>, Chenjie Xu<sup>a,b,g,\*</sup>

<sup>a</sup>. School of Chemical and Biomedical Engineering, Nanyang Technological University, 62 Nanyang Drive, 637459, Singapore

<sup>b</sup>. NTU Institute for Health Technologies, Interdisciplinary Graduate School, Nanyang Technological University, 50 Nanyang Drive, Singapore 637553

<sup>c</sup>. Lee Kong Chian School of Medicine, Nanyang Technological University, Singapore, 59 Nanyang Drive Singapore 636921

<sup>d</sup>. Institute of Molecular and Cell Biology, Agency for Science, Technology and Research (A\*STAR), Proteos, Singapore, 61 Biopolis Dr, Singapore 138673

<sup>e</sup>. Singapore Eye Research Institute, The Academia, 20 College Road, Discovery Tower Level 6, Singapore 169856

<sup>f</sup>. Institute of Ophthalmology, University College London, 11-43 Bath Street, London, UK, EC1V 9EL

<sup>g</sup>. National Dental Centre of Singapore, 5 Second Hospital Ave, Singapore 168938

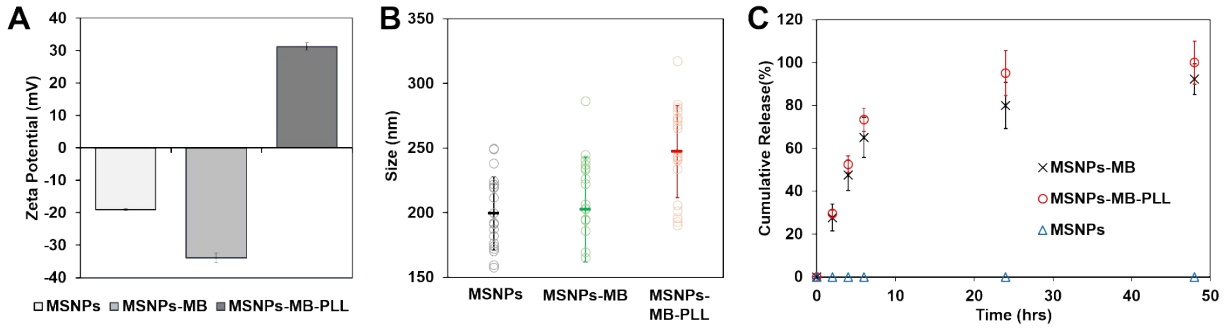

**Supplementary Figure 1.** Characterization of MSNPs derived formulations: (A) Zeta potential and (B) diameter of MSNPs, MSNPs-MB, MSNPs-MB-PLL (n =20). (C) Release profile of MBs from MSNPs, MSNPs-MB and MSNPs-MB-PLL in a period of 48 hours. Each dot on bar chart (B) represent an independent sample measurement. n=3, all data are mean  $\pm$  SD.

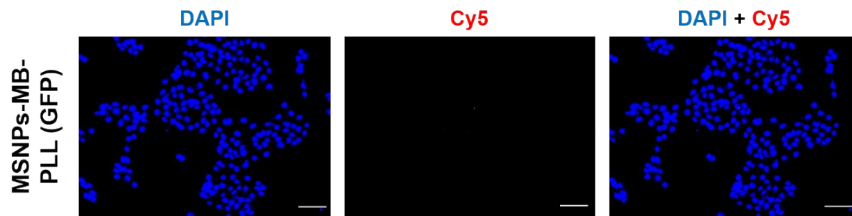

**Supplementary Figure 2.** Representative fluorescent images of RT3 cells treated with MSNPs-GFP MB-PLL. Scale bar: 100  $\mu$ m.

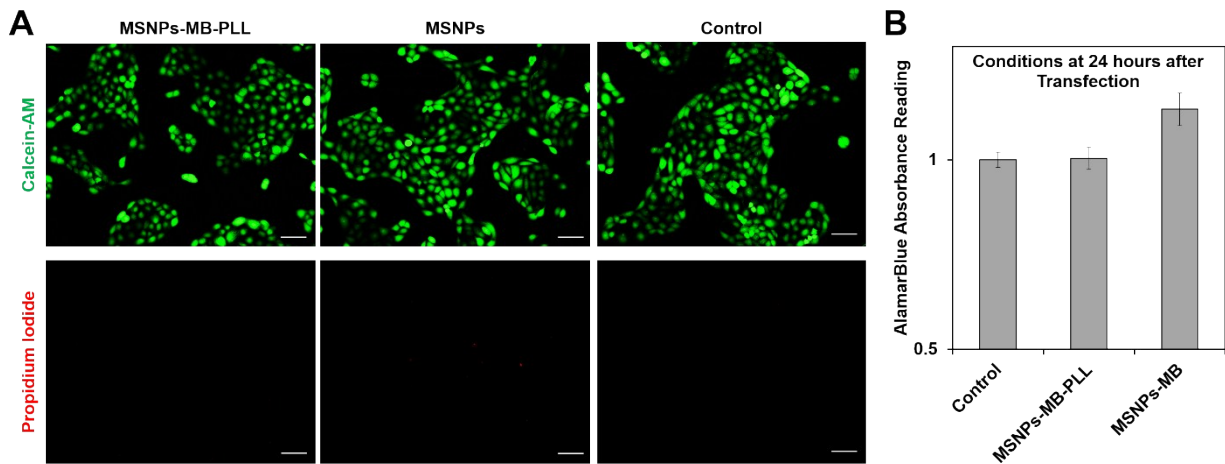

**Supplementary Figure 3.** Biocompatibility of MSNPs-MB and MSNPs-MB-PLL: (A) Representative fluorescence images of live/dead staining assay and (B) Alamar blue assay of RT3 cells treated with MSNPs-MB and MSNPs-MB-PLL 24 hours post treatment. Scale bar: 100  $\mu$ m. n=3, all data are mean  $\pm$  SD.

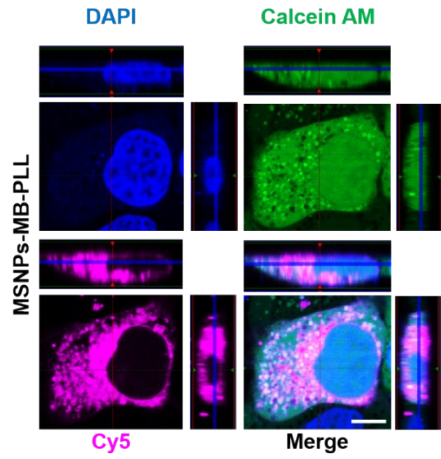

**Supplementary Figure 4.** Confocal Z-stacked image of RT3 cell treated with MSNPs-MB-PLL. Scale bar: 100  $\mu\text{m}$

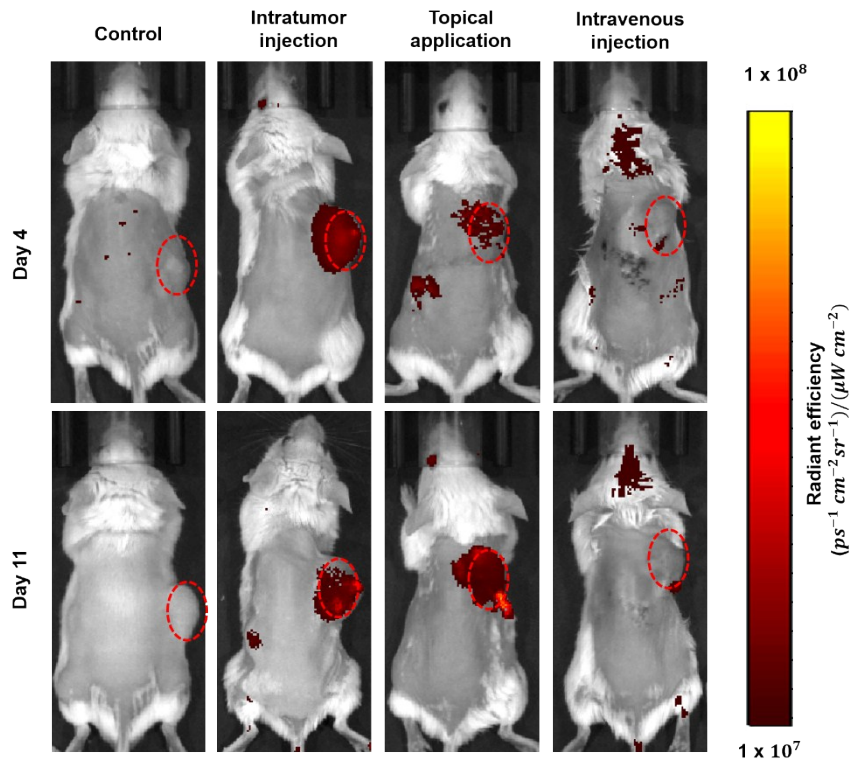

**Supplementary Figure 5.** Representative images of mice treated with MSNPs-Cy5-PLL at day 4 and 11.

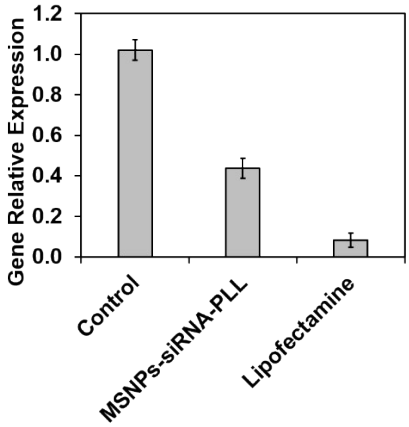

**Supplementary Figure 6.** TGFβR-1 gene expression on RT3 cells post the treatment of MSNPs-siRNA-PLL. n=3, all data are mean ± SD.

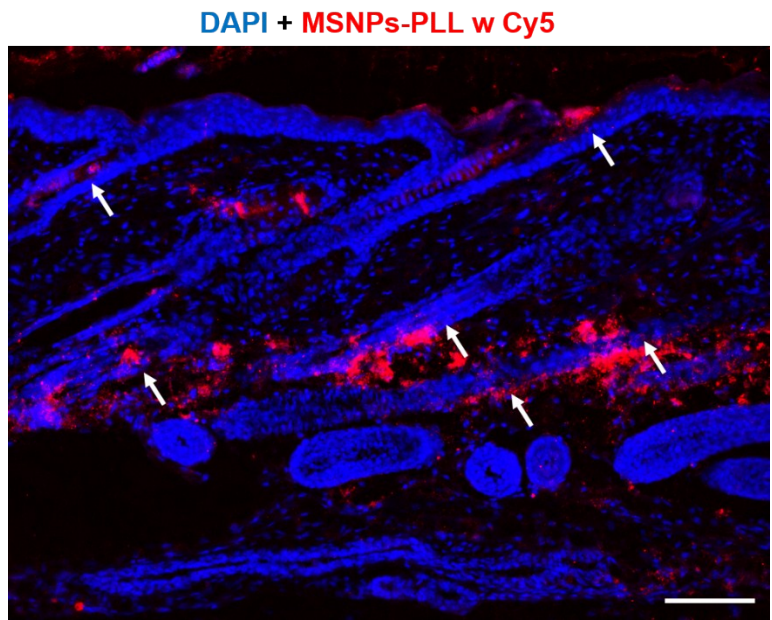

**Supplementary Figure 7.** Fluorescence image of mice skin treated with topical MSNPs-PLL with Cy5. White arrows indicate the hair follicles. Scale bar: 100 μm.
